# Supplementary material for: Synthesis, structural determination and dynamic behavior of 2-chloro-4,6-bis(pyrazolylamino)-1,3,5-triazines
Source: Royal Society of Chemistry journal article supplement (doi:10.1039/b310693d), 2003-01-01
Supplement: b310693d.doc [file b310693d.doc]

Supplementary data

**Table S-1.** 13C-NMR spectra of compounds **1–8**, rapid process,  (ppm) (see Schemes 1 and 3 for atom numbering).

| Compound | **1** | **1** | **2** | **2** | **3** | **3** | **4** | **5** | **6** | **7** | **8** |
| --- | --- | --- | --- | --- | --- | --- | --- | --- | --- | --- | --- |
| **Solvent** | **DMF** | **CDCl3** | **DMSO** | **DMF** | **DMSO** | **DMF** | **DMSO** | **DMSO** | **CDCl3** | **CDCl3** | **CDCl3** |
| **T (K)** | **293** | **293** | **333** | **363** | **293** | **333** | **403** | **293** | **293** | **293** | **293** |
| **C-2** | 169.84 | a | 169.14 | 171.05 | a | 169.53 | 168.06 | 163.85 | a | 169.45 | 169.67 |
| **C-4** | 165.16 | 164.02 | 164.85 | a | 164.17 | 164.97 | 163.44 | 163.85 | a | 164.10 | 164.45 |
| **C-6** | 165.16 | 164.02 | 164.85 | a | 164.17 | 164.97 | 163.44 | 163.85 | 163.85 | 164.10 | 164.45 |
| **C-3 (pyrazole)** | 141.71 | 141.55 | 141.53 | 141.28 | 141.40 | 141.09 | 134.07 | 141.69 | 141.65 |  |  |
| **C-4 (pyrazole)** | 107.80 | 107.24 | 108.39 | 101.00 | 107.68 | 107.88 | 122.84 | 107.52 | 107.50 |  |  |
| **C-5 (pyrazole)** | 131.75 | 129.98 | 130.22 | 130.05 | 126.70 | 127.77 | 118.40 | 129.92 | 129.88 |  |  |
| **C-1'** | 132.47 | 131.22 | 140.80 | 140.47 | 136.85 | 137.60 | 139.40 | 132.60 | 130.12 |  |  |
| **C-2'** | 131.31 | 127.48 | 112.33 | 112.47 | 119.80 | 119.48 | 117.71 | 130.14 | 129.57 | 44.42 | 43.84 |
| **C-3'** | 124.49 | 123.05 | 140.08 | a | 121.95 | 122.38 | 128.68 | 122.60 | 122.58 | 24.64 | 66.69 |
| **C-4'** | 128.08 | 124.18 | 114.48 | 114.61 | 135.38 | 136.69 | 125.34 | 125.55 | 125.52 | 25.74 |  |
| **C-5'** | 128.08 | 124.18 | 119.64 | 119.56 | 121.95 | 122.38 | 128.68 | 127.80 | 127.77 | 24.64 | 66.69 |
| **C-6'** | 125.92 | 123.05 | 128.26 | 127.87 | 119.80 | 119.48 | 117.71 | 123.84 | 123.82 | 44.42 | 43.84 |

a not detected

**Table S-2.** 1H-NMR spectra of compounds **1–8**, rapid process,  (ppm), *J* (Hz) (see Schemes 1 and 3 for atom numbering).

| Comp. |  | **1** | **1** | **1** | **2** | **2** | **3** | **3** | **4** | **4** | **5** | **5** | **5** | **6** | **7** | **8** |
| --- | --- | --- | --- | --- | --- | --- | --- | --- | --- | --- | --- | --- | --- | --- | --- | --- |
| **Solvent** |  | **DMSO** | **DMF** | **CDCl3** | **DMSO** | **DMF** | **DMSO** | **DMF** | **DMSO** | **DMF** | **DMF** | **CDCl3** | **DMSO** | **CDCl3** | **CDCl3** | **CDCl3** |
| **(K)** |  | **293** | **293** | **293** | **333** | **363** | **293** | **333** | **403** | **403** | **293** | **293** | **293** | **293** | **293** | **293** |
| **H-3 pyrazole** | **** J | 7.78  bs | 7.88  d  1.2 | 7.78 dd  2, 0.5 | 7.70  d  1.5 | 7.54  d  1.0 | 7.72  d  1.5 | 7.58  d  1.7 | 7.87  s | 7.99 s | 7.92  d  1.4 | 7.86  d  1.5 | 7.87  d  1.2 | 7.83  d  1.8 |  |  |
| **H-4 pyrazole** | **** *J* | 6.49  bs | 6.57 dd  2.4, 1.2 | 6.49  t  2 | 6.49  t  1.9 | 6.34  t  1.9 | 6.49  dd  2.2, 1.5 | 6.38 dd  2.4, 1.7 |  |  | 6.58 dd  2.1, 1.4 | 6.48 dd  2.2, 1.5 | 6.52  dd  2.7, 1.2 | 6.52  t  2.4 |  |  |
| **H-5 pyrazole** | **** J | 8.10  d  2.2 | 8.29  d  2.4 | 7.85  dd  2, 0.5 | 8.29  d  2.2 | 8.11  d  1.7 | 7.92  d  2.2 | 8.27  d  2.4 | 8.44  s | 9.65  s | 8.30  d  2.1 | 7.75  d  2.2 | 7.83  d  2.7 | 7.86 dd  2.4, 0.7 |  |  |
| **H-2'** | **** J |  |  |  | 8.08  s | 7.84  s | 7.67  d  9.0 | 7.72  d  9.0 | 7.71  d  8.1 | 7.77  d  7.8 |  |  |  |  | 3.72  t  5.4 | 3.71 m |
| **H-3'** | **** J | 7.56  d  9 | 7.66  dd  7.8, 1.2 | 7.33  d  8.1 |  |  | 7.70  d  9.0 | 7.79  d  9.0 | 7.41  t  7.6 | 7.44  t  7.3 | 7.60  dd  1.3, 8.1 | 7.5-7.2  m | 7.38  dd  1.5, 8.0 | 7.44  td 1.2, 8.5 | 1.58  m | 3.79  m |
| **H-4'** | **** J | 7.32  d  7.6 | 7.35  dd  7.5, 1.4 | 7.20  t  8.5 | 7.41  d  8.8 | 7.41  dd  8.1, 0.8 |  |  | 7.25  t  7.4 | 7.27  t  7.4 | 7.25  td  7.8 | 7.13  t  8.1 | 7.28  td  1.3, 8.1 | 7.28  td  1.2, 8.1 | 1.64  m |  |
| **H-5'** | **** J | 7.34  d  7.6 | 7.46  td  7.8, 1.4 | 7.36  t  7.3 | 7.28  t  8.1 | 7.23  t  7.9 | 7.70  d  9.0 | 7.79  d  9.0 | 7.41  t  7.6 | 7.44  t  7.3 | 7.44  td  8.8 | 7.5–7.2  m | 7.44  td  1.7, 9.1 | 7.38  dd  1.2, 8.1 |  |  |
| **H-6'** | **** J | 7.84  bs | 8.19  bs | 8.41  d  8.3 | 7.81  t  7.8 | 7.59  t  8.2 | 7.67  d  9.0 | 7.72  d  9.0 | 7.71  d  8.1 | 7.77  d  7.8 | 8.40  d  9.0 | 8.49  d  8.1 | 8.36  dd  1.5, 8.3 | 8.37  dd  1.2, 8.3 |  |  |
| **NH** | **** | 10.95  s | 10.34  s | 10.15  s | 9.36  s | 9.83  s | 7.4  bs | 10.00  s | 9.81  s | 10.93 | 9.84  s | 9.46  s | 10.94  s | 10.93  s |  |  |

**Table S-3.** 13C-NMR spectra of compounds **1–4**, slow process,  (ppm) (see Schemes 1 and 2 for atom numbering).

|  | **a** | | | |  | **b** | | | |  | **c** |
| --- | --- | --- | --- | --- | --- | --- | --- | --- | --- | --- | --- |
| Compounda | **1** | **3** | **4** | **4** |  | **1** | **3** | **4** | **4** |  | **1** |
| **Solvent** | **CDCl3** | DMF | **DMSO** | DMF |  | **CDCl3** | DMF | **DMSO** | DMF |  | **CDCl3** |
| **T (K)** | **213** | **213** | **298** | **298** |  | **213** | **213** | **298** | **298** |  | **213** |
| **C-2** | 168.87 | 169.33 | 168.59 | 167.83 |  | 169.39 | 169.69 | 168.04 | 167.83 |  |  |
| **C-4** | 163.32 | 164.92 | 164.08 | 164.88 |  | 163.46b | 164.98c | 163.74d | 164.88 |  |  |
| **C-6** | 163.32 | 164.92 | 164.08 | 164.88 |  | 162.96b | 164.08c | 162.37d | 164.88 |  |  |
| **C-3 pyrazole** | 141.68 | 141.73 | 135.17 | 135.99 |  | 141.68  141.32 | 141.73 | 134.24  133.37 | 134.57  134.09 |  |  |
| **C-4 pyrazole** | 107.32 | 108.70 | 123.00 | 124.25 |  | 107.32 | 108.70 | 123.72  123.21 | 124.97  124.50 |  |  |
| **C-5 pyrazole** | 129.96 | 128.25 | 119.28 | 120.12 |  | 129.96  129.70 | 128.39 | 118.38  117.85 | 118.87  118.76 |  | 129.36 |
| **C-1'** | 130.22 | 137.55 | 139.4 | e |  | 130.33  130.22 | 138.11  137.98 | 139.73  139.60 | e |  |  |
| **C-2'** | 127.04 | 119.44 | 117.65 | 118.57 |  | 127.97  127.51 | 119.52  119.25 | 118.03  117.97 | 118.69  118.50 |  |  |
| **C-3'** | 122.93 | 122.69 | 129.34 | 130.18 |  | 123.18 | 121.91  121.65 | 129.54  129.46 | 130.23  130.13 |  |  |
| **C-4'** | 124.41 | 136.70 | 125.92 | 126.68 |  | 124.41 | 136.39  136.19 | 126.08  125.92 | 136.79  126.68 |  |  |
| **C-5'** | 124.07 | 122.69 | 129.34 | 130.18 |  | 124.07 | 121.91  121.65 | 129.54  129.46 | 130.23  130.13 |  |  |
| **C-6'** | 123.49 | 119.44 | 117.65 | 118.57 |  | 123.49 | 119.52  119.25 | 118.03  117.97 | 118.69  118.50 |  |  |

a  Compounds **2** and **5** are not sufficiently soluble to record the 13C-NMR at low temperature. b, c, d These signals can be interchanged. e not detected

**Table S-4.** 1H-NMR spectra of compounds **1–5**, slow process,  (ppm), *J* (Hz) (see Schemes 1 and 2 for atom numbering).

|  |  | **1a-4a** | | | | | | **5d** | |
| --- | --- | --- | --- | --- | --- | --- | --- | --- | --- |
| Compound |  | **1** | **1** | **2** | **3** | **4** | **4** | **5** | **5** |
| **Solvent** |  | **DMF** | **CDCl3** | **DMF** | **DMF** | **DMSO** | **DMF** | **DMF** | **CDCl3** |
| **T (K)** |  | **213** | **213** | **223** | **213** | **298** | **298** | **213** | **203** |
| **H-3 pyrazole** | ****  ***J*** | 8.00 d  2.0 | 7.86 d  1.8 | 8.28 s | 7.73 s | 7.84 s | 7.99 s | a | 7.85 s |
| **H-4 pyrazole** | **** J | 6.62 dd  2.0, 2.4 | 6.51 dd  2.4, 1.5 | 6.63 s | 6.52 s | 7.30* m | 7.40 d  7.4 | 6.65 s | 6.49 s |
| **H-5 pyrazole** | ****  ***J*** | 8.45 d  2.4 | 7.80 d  2.4 | 8.64 s | 8.59 s | 8.46 s | 8.62 s | 8.00 s | 7.74 s |
| **H-2'** | ****  ***J*** |  |  | 7.93–7.60 m | 7.82 d  8.3 | 7.67 d  7.7 | 7.81 d  7.5 |  |  |
| **H-3'** | ****  ***J*** | 7.75–7.30 m | 7.5–7.15 m |  | 7.93 d  8.5 | 7.30* m | 7.75 t  8.0 | 7.63 m | 7.5–7.1 m |
| **H-4'** | ****  ***J*** | 7.75–7.30 m | 7.5–7.15 m | 7.93–7.60 m |  | 7.30* m | 7.40 d  7.4 | 7.28 m | 7.5–7.1 m |
| **H-5'** | ****  ***J*** | 7.75–7.30 m | 7.5–7.15 m | 7.25 t  8.1 | 7.93 d  8.5 | 7.30* m | 7.75 t  8.0 | 7.47 m | 7.5–7.1 m |
| **H-6'** | ****  ***J*** | 8.23 d  8.1 | 8.37 d  8.1 | 7.93–7.60 m | 7.8s d  8.3 | 7.67 d  7.7 | 7.81 d  7.5 | a | 8.39 d  8.0 |
| **NH** | **** | 10.42 s | 10.29 s | 10.71 s | 10.65 s | 10.25 s | 10.13 s | 10.14 s | 9.70 s |

|  |  | **1b-4b** | | | | | | **5e** | |
| --- | --- | --- | --- | --- | --- | --- | --- | --- | --- |
| Compound |  | **1** | **1** | **2** | **3** | **4** | **4** | **5** | **5** |
| **Solvent** |  | **DMF** | **CDCl3** | **DMF** | **DMF** | **DMSO** | **DMF** | **DMF** | **CDCl3** |
| **T (K)** |  | **213** | **213** | **223** | **213** | **298** | **298** | **213** | **203** |
| **H-3 pyrazole** | ****  ***J***  | 7.92 d  1.3 | 7.86 d  1.8 | 8.48 s  8.41 s | 7.73 s | 7.91 s  7.84 s | 7.97 s  7.95 s | 8.31 s | 7.91 s |
| **H-4 pyrazole** | **** J **** *J* | 6.67 dd  2.0, 2.4  6.62 t  2.1 | 6.51 dd  2.4, 1.5 | 6.67 | 6.52 s |  |  | 6.69 s | 6.49 s |
| **H-5 pyrazole** | ****  ***J***  **** *J* | 8.49 d  2.2  8.38 d  2.2 | 7.80 d  2.4  7.78 d  1.7 | 8.73 s | 8.62 s | 8.80 s  8.50 s | 8.87 s  8.61 s | 8.02 s | 7.74 s |
| **H-2'** | ****  ***J***  ****  ***J*** |  |  | 7.93–7.60 m | 7.82 d  8.3  7.81 d  8.3 | 7.85 m  7.78 d  8.1 | 7.87 d  7.6  7.85 d  7.8 |  |  |
| **H-3’** | ****  ***J***  **** | 7.75–7.30 m | 7.5–7.15 m |  | 7.93 d  8.5 | 7.49b m  7.47b m | 7.75 t  8.0 | 7.63 m | 7.5–7.1 m |
| **H-4'** | ****  ***J***  ****  ***J*** | 7.75–7.30 m | 7.5–7.15 m | 7.93–7.60 m |  | 7.30b m  7.19 t  7.2 | 7.34 d  7.6  7.26 d  7.0 | 7.28 m | 7.5–7.1 m |
| **H-5'** | ****  ***J***  **** *J* | 7.75–7.30 m | 7.5–7.15 m | 7.57 t  8.3  7.54 t  8.0 | 7.93 d  8.5 | 7.49b m  7.47b m | 7.75 t  8.0 | 7.47 m | 7.5–7.1 m |
| **H-6'** | ****  ***J***  **** *J* | 8.32 d  8.1  8.23 d  8.1 | 8.45 d  8.3  8.29 d  8.1 | 7.93–7.60 m | 7.82 d  8.3  7.81 d  8.3 | 7.85 m  7.78 d  8.1 | 7.87 d  7.6  7.85 d  7.8 | 8.48 m  8.42 m | 8.47 d  7.5  8.46 d  8.0 |
| **NH** | ****  **** | 10.62 s  10.57 s | 10.19 s  10.16 s | 11.12 s  10.75 s | 10.92 s  10.59 s | 10.41 s  10.30 s | 10.37 s  9.97 s | 10.03 s  9.96 s | 9.64 s  9.59 s |

|  |  | **1c-2c** | | |
| --- | --- | --- | --- | --- |
| Compound |  | **1** | **1** | **2** |
| **Solvent** |  | **DMF** | **CDCl3** | **DMF** |
| **T (K)** |  | **213** | **213** | **223** |
| **H-3 pyrazole** | ****  ***J*** | 7.98 d  1.7 | 7.92 bs | a |
| **H-4 pyrazole** | **** J | 6.6 dd  2.4, 2.0 | 6.51 dd  2.4, 1.5 | a |
| **H-5 pyrazole** | ****  ***J*** | 8.45 d  2.4 | 7.80 d  2.4 | a |
| **H-3'** | **** | 7.75–7.30 m | 7.5–7.15 m |  |
| **H-4'** | **** | 7.75–7.30 m | 7.5–7.15 m | a |
| **H-5'** | **** | 7.75–7.30 m | 7.5–7.15 m | a |
| **H-6'** | ****  ***J*** | 8.23 d  8.1 | 8.22 d  7.8 | a |
| **NH** | **** | 10.54 s | 10.08 s | 10.86 s |

a Not detected. b These signals can be interchanged.
